# Supplementary material
Source: PubMed Central journal article supplement (PMC9073658)
Supplement: jamaoncol-e220009-s001.pdf [file jamaoncol-e220009-s001.pdf]

## Supplementary Online Content

Clarke MA, Devesa SS, Hammer A, Wentzensen N. Racial and ethnic differences in hysterectomy-corrected uterine corpus cancer mortality by stage and histologic subtype. *JAMA Oncol*. Published online May 5, 2022. doi:10.1001/jamaoncol.2022.0009

**eMethods.** Detailed Methods

**eFigure 1.** Corpus and Uterus, NOS Cancer Observed NCHS Mortality and Incidence-Based Mortality, SEER 18 (2000-2017)

**eTable 1.** Histologic Subtype Groupings Among Corpus and Uterus, NOS Cancer Deaths in SEER 18 Incidence-Based Mortality File, 2010-2017, (N=16 797)

**eFigure 2.** Uterine Sarcoma Incidence-Based Mortality, SEER 18 (2010-2017), Uncorrected and Corrected for Hysterectomy

**eTable 2.** Uterine Cancer Incidence-Based Mortality Rates by Year (2010 and 2017), Subtype, and Race and Ethnicity, Uncorrected and Corrected for Hysterectomy, SEER 18

This supplementary material has been provided by the authors to give readers additional information about their work.

## eMethods

### **Comparison of Observed Corpus and Uterus, NOS deaths in the SEER Mortality Database and in the SEER18 Incidence-Based Mortality Database**

The SEER18 Incidence-Based Mortality database includes deaths that occurred between 2000 and 2017 among cancer cases registered in 18 SEER registries, covering approximately 26% of the U.S. population. Standard mortality analyses in SEER are based on causes of death ascertained from death certificates obtained by the National Center for Health Statistics (NCHS). These death certificates have no information on tumor characteristics beyond the cancer site. In the incidence-based mortality file, uterine cancer deaths can be linked to incident uterine cancer cases registered in SEER, allowing evaluation of mortality rates according to tumor characteristics such as histology and stage. Due to the lag time between cancer diagnosis and death, sufficient follow-up time is needed to obtain reliable mortality estimates. Incidence-based mortality rates may be severely underestimated in the initial years following cancer diagnosis. Specifically, uterine cancer deaths occurring between 2000 and 2017, particularly in the earlier years, may have been among cases diagnosed prior to 2000, when incidence data were not available from all 18 registries. Therefore, to determine the appropriate time window for our incidence-based mortality analysis, we compared incidence-based uterine cancer mortality rates (using the selection criteria described in the Methods section of the manuscript) to the observed uterine cancer mortality rates (death certificate data from NCHS mortality file, restricted to SEER18 registries) from 2000 to 2017. As shown in eFigure 1, the incidence-based mortality rate trends became parallel to the observed NCHS mortality rates by 2010; therefore, we allowed for 10 years of follow-up of incident cases to ensure that incidence-based mortality rates capture almost all uterine cancer deaths in our analysis, and present incidence-based mortality rates only for 2010 to 2017.

### **Reallocation of Adenocarcinoma NOS Deaths**

We reclassified deaths attributed to Adenocarcinoma NOS histology to account for changes in pathology reporting (moving from more general, non-specific categories to reporting more specific histology results) in recent years. Grouping Adenocarcinoma NOS cases separately, or with Endometrioid subtypes, which has been done in many studies, would lead to biased estimates since the changes in Adenocarcinoma NOS (decreasing in both incidence and mortality) do not reflect true changes in incidence and mortality, but are secondary to changes in pathology reporting over time. This is particularly true for an incidence-based mortality analysis, where non-Endometrioid subtypes constitute a greater proportion of overall uterine cancer deaths compared to incident cases.

To reclassify deaths attributed to Adenocarcinoma NOS as either Endometrioid or Non-endometrioid, we calculated the distribution of deaths occurring in cases diagnosed with Endometrioid and Non-Endometrioid histology by year, age group, race and ethnicity, and stage, respectively. Then we applied the proportions of endometrioid and non-endometrioid deaths to the total number of deaths from Adenocarcinoma, NOS within each stratum. For example, among non-Hispanic Whites aged 65-69 years in 2016 with localized disease, the proportion of deaths from Endometrioid cancers is 68% and the proportion of deaths from Non-Endometrioid cancers is 32%. When applying these proportions to the 15 cases of adenocarcinoma in that strata, 10 deaths would be reclassified as Endometrioid and 5 deaths would be reclassified as Non-Endometrioid.

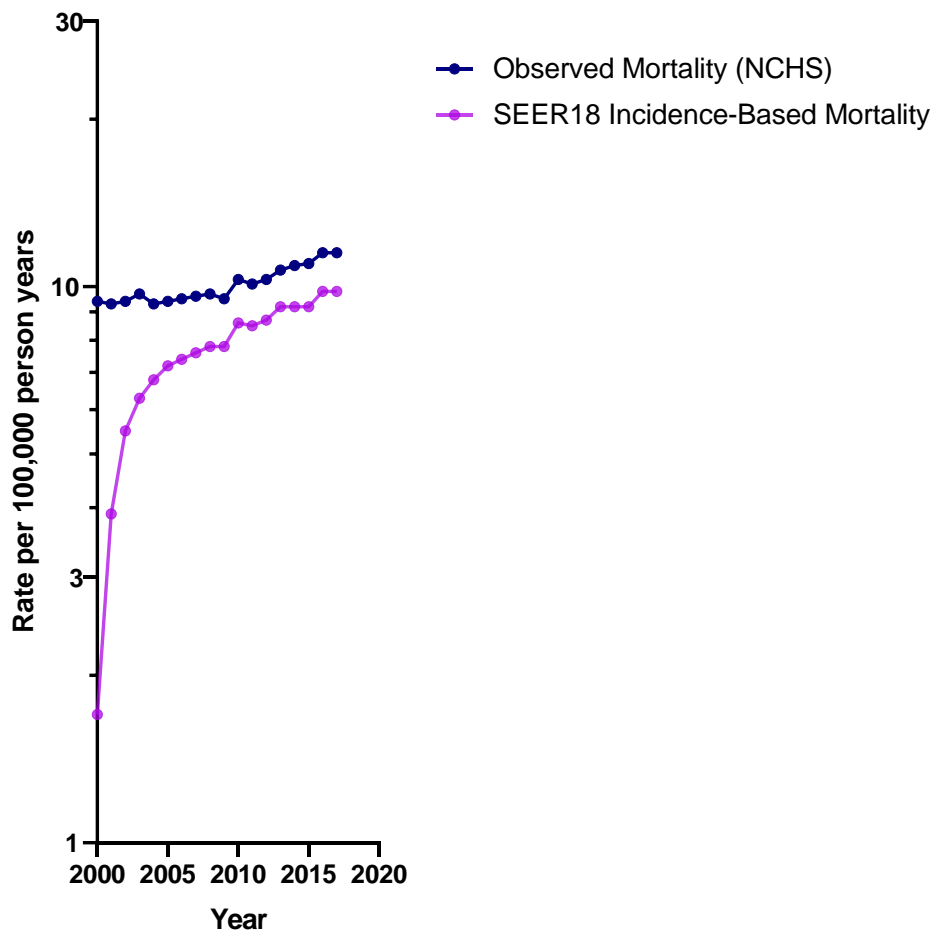

**eFigure 1. Corpus and Uterus, NOS Cancer Observed NCHS Mortality and Incidence-Based Mortality, SEER18 (2000-2017).** Trends in age-adjusted observed NCHS mortality and incidence-based mortality rates of microscopically confirmed uterine corpus cancer, among US women aged 40 to 85+ years. Rates are shown separately for National Center for Health Statistics (NCHS) Mortality estimates (death certificate only data, shown in solid navy circles) and SEER Incidence-Based Mortality estimates (corpus and uterus, NOS cases linked to corpus and uterus, NOS deaths, shown in solid pink circles). A follow-up period of 10 years for incident cases was determined based on when incidence-based mortality rates were parallel with mortality rates (approximately in 2010).

| eTable 1. Histologic Subtype Groupings among Corpus and Uterus, NOS Cancer Deaths in SEER18 Incidence-Based Mortality File, 2010-2017, (N=16,797)**^ |                                                            |              |
|------------------------------------------------------------------------------------------------------------------------------------------------------|------------------------------------------------------------|--------------|
| Histologic Subtype                                                                                                                                   | Histology                                                  | Count        |
| Endometrioid                                                                                                                                         | 8050/3: Papillary carcinoma, NOS                           | 11           |
| Endometrioid                                                                                                                                         | 8141/3: Scirrhus adenocarcinoma                            | 1            |
| Endometrioid                                                                                                                                         | 8210/3: Adenocarcinoma in adenomatous polyp                | 39           |
| Endometrioid                                                                                                                                         | 8260/3: Papillary adenocarcinoma, NOS                      | 48           |
| Endometrioid                                                                                                                                         | 8261/3: Adenocarcinoma in villous adenoma                  | 1            |
| Endometrioid                                                                                                                                         | 8262/3: Villous adenocarcinoma                             | 3            |
| Endometrioid                                                                                                                                         | 8263/3: Adenocarcinoma in tubulovillous adenoma            | 6            |
| Endometrioid                                                                                                                                         | 8380/3: Endometrioid carcinoma                             | 5,857        |
| Endometrioid                                                                                                                                         | 8381/3: Endometrioid adenofibroma, malignant               | 2            |
| Endometrioid                                                                                                                                         | 8382/3: Endometrioid adenocarcinoma, secretory variant     | 15           |
| Endometrioid                                                                                                                                         | 8383/3: Endometrioid adenocarcinoma, ciliated cell variant | 5            |
| Endometrioid                                                                                                                                         | 8440/3: Cystadenocarcinoma, NOS                            | 3            |
| Endometrioid                                                                                                                                         | 8480/3: Mucinous adenocarcinoma                            | 55           |
| Endometrioid                                                                                                                                         | 8481/3: Mucin-producing adenocarcinoma                     | 5            |
| Endometrioid                                                                                                                                         | 8560/3: Adenosquamous carcinoma                            | 131          |
| Endometrioid                                                                                                                                         | 8570/3: Adenocarcinoma with squamous metaplasia            | 94           |
| <b>Total Endometrioid</b>                                                                                                                            |                                                            | <b>6,276</b> |
| Non-Endometrioid                                                                                                                                     | 8255/3: Adenocarcinoma with mixed subtypes                 | 93           |
| Non-Endometrioid                                                                                                                                     | 8310/3: Clear cell adenocarcinoma, NOS                     | 493          |
| Non-Endometrioid                                                                                                                                     | 8323/3: Mixed cell adenocarcinoma                          | 1,171        |
| Non-Endometrioid                                                                                                                                     | 8441/3: Serous cystadenocarcinoma, NOS                     | 1,476        |
| Non-Endometrioid                                                                                                                                     | 8460/3: Papillary serous cystadenocarcinoma                | 1,055        |
| Non-Endometrioid                                                                                                                                     | 8461/3: Serous surface papillary carcinoma                 | 116          |
| Non-Endometrioid                                                                                                                                     | 8950/3: Mullerian mixed tumor                              | 782          |
| Non-Endometrioid                                                                                                                                     | 8951/3: Mesodermal mixed tumor                             | 52           |
| Non-Endometrioid                                                                                                                                     | 8980/3: Carcinosarcoma, NOS                                | 1,738        |
| Non-Endometrioid                                                                                                                                     | 8981/3: Carcinosarcoma, embryonal                          | 2            |
| <b>Total Non-Endometrioid</b>                                                                                                                        |                                                            | <b>6,978</b> |
| Sarcomas                                                                                                                                             | 8800/3: Sarcoma, NOS                                       | 140          |
| Sarcomas                                                                                                                                             | 8801/3: Spindle cell sarcoma                               | 12           |
| Sarcomas                                                                                                                                             | 8802/3: Giant cell sarcoma                                 | 12           |
| Sarcomas                                                                                                                                             | 8804/3: Epithelioid sarcoma                                | 5            |
| Sarcomas                                                                                                                                             | 8805/3: Undifferentiated sarcoma                           | 48           |
| Sarcomas                                                                                                                                             | 8840/3: Myxosarcoma                                        | 1            |
| Sarcomas                                                                                                                                             | 8850/3: Liposarcoma, NOS                                   | 1            |
| Sarcomas                                                                                                                                             | 8890/3: Leiomyosarcoma, NOS                                | 843          |
| Sarcomas                                                                                                                                             | 8891/3: Epithelioid leiomyosarcoma                         | 38           |

|                                        |                                                                   |       |
|----------------------------------------|-------------------------------------------------------------------|-------|
| Sarcomas                               | 8895/3: Myosarcoma                                                | 1     |
| Sarcomas                               | 8896/3: Myxoid leiomyosarcoma                                     | 26    |
| Sarcomas                               | 8900/3: Rhabdomyosarcoma, NOS                                     | 27    |
| Sarcomas                               | 8901/3: Pleomorphic rhabdomyosarcoma, adult type                  | 9     |
| Sarcomas                               | 8902/3: Mixed type rhabdomyosarcoma                               | 3     |
| Sarcomas                               | 8910/3: Embryonal rhabdomyosarcoma, NOS                           | 1     |
| Sarcomas                               | 8912/3: Spindle cell rhabdomyosarcoma                             | 1     |
| Sarcomas                               | 8920/3: Alveolar rhabdomyosarcoma                                 | 2     |
| Sarcomas                               | 8930/3: Endometrial stromal sarcoma, NOS                          | 258   |
| Sarcomas                               | 8931/3: Endometrial stromal sarcoma, low grade                    | 43    |
| Sarcomas                               | 8933/3: Adenosarcoma                                              | 108   |
| Sarcomas                               | 8935/3: Stromal sarcoma, NOS                                      | 34    |
| Sarcomas                               | 9120/3: Hemangiosarcoma                                           | 1     |
| <b>Total Sarcomas</b>                  |                                                                   | 1,614 |
| <b>Adenocarcinoma, NOS<sup>#</sup></b> | 8140/3: Adenocarcinoma, NOS                                       | 1,128 |
|                                        |                                                                   |       |
| Other                                  | 8000/3: Neoplasm, malignant                                       | 108   |
| Other                                  | 8004/3: Malignant tumor, spindle cell type                        | 1     |
| Other                                  | 8005/3: Malignant tumor, clear cell type                          | 1     |
| Other                                  | 8010/3: Carcinoma, NOS                                            | 365   |
| Other                                  | 8012/3: Large cell carcinoma, NOS                                 | 4     |
| Other                                  | 8013/3: Large cell neuroendocrine carcinoma                       | 7     |
| Other                                  | 8015/3: Glassy cell carcinoma                                     | 1     |
| Other                                  | 8020/3: Carcinoma, undifferentiated, NOS                          | 116   |
| Other                                  | 8021/3: Carcinoma, anaplastic, NOS                                | 1     |
| Other                                  | 8022/3: Pleomorphic carcinoma                                     | 1     |
| Other                                  | 8030/3: Giant cell and spindle cell carcinoma                     | 1     |
| Other                                  | 8031/3: Giant cell carcinoma                                      | 1     |
| Other                                  | 8032/3: Spindle cell carcinoma, NOS                               | 3     |
| Other                                  | 8033/3: Pseudosarcomatous carcinoma                               | 6     |
| Other                                  | 8041/3: Small cell carcinoma, NOS                                 | 27    |
| Other                                  | 8045/3: Combined small cell carcinoma                             | 3     |
| Other                                  | 8046/3: Non-small cell carcinoma                                  | 11    |
| Other                                  | 8052/3: Papillary squamous cell carcinoma                         | 1     |
| Other                                  | 8070/3: Squamous cell carcinoma, NOS                              | 38    |
| Other                                  | 8071/3: Squamous cell carcinoma, keratinizing, NOS                | 4     |
| Other                                  | 8072/3: Squamous cell carcinoma, large cell, nonkeratinizing, NOS | 2     |
| Other                                  | 8074/3: Squamous cell carcinoma, spindle cell                     | 1     |
| Other                                  | 8082/3: Lymphoepithelial carcinoma                                | 1     |
| Other                                  | 8130/3: Papillary transitional cell carcinoma                     | 3     |
| Other                                  | 8200/3: Adenoid cystic carcinoma                                  | 1     |

|                                                                                                                                                                                                                                                                                                                                                                                                                                                                                                                                                                                               |                                                              |               |
|-----------------------------------------------------------------------------------------------------------------------------------------------------------------------------------------------------------------------------------------------------------------------------------------------------------------------------------------------------------------------------------------------------------------------------------------------------------------------------------------------------------------------------------------------------------------------------------------------|--------------------------------------------------------------|---------------|
| Other                                                                                                                                                                                                                                                                                                                                                                                                                                                                                                                                                                                         | 8240/3: Carcinoid tumor, NOS                                 | 1             |
| Other                                                                                                                                                                                                                                                                                                                                                                                                                                                                                                                                                                                         | 8244/3: Mixed adenoneuroendocrine carcinoma (ICD-O-3 update) | 1             |
| Other                                                                                                                                                                                                                                                                                                                                                                                                                                                                                                                                                                                         | 8246/3: Neuroendocrine carcinoma, NOS                        | 52            |
| Other                                                                                                                                                                                                                                                                                                                                                                                                                                                                                                                                                                                         | 8290/3: Oxyphilic adenocarcinoma                             | 1             |
| Other                                                                                                                                                                                                                                                                                                                                                                                                                                                                                                                                                                                         | 8313/3: Clear cell adenocarcinofibroma                       | 1             |
| Other                                                                                                                                                                                                                                                                                                                                                                                                                                                                                                                                                                                         | 8410/3: Sebaceous adenocarcinoma                             | 1             |
| Other                                                                                                                                                                                                                                                                                                                                                                                                                                                                                                                                                                                         | 8450/3: Papillary cystadenocarcinoma, NOS                    | 2             |
| Other                                                                                                                                                                                                                                                                                                                                                                                                                                                                                                                                                                                         | 8482/3: Mucinous adenocarcinoma, endocervical type           | 1             |
| Other                                                                                                                                                                                                                                                                                                                                                                                                                                                                                                                                                                                         | 8510/3: Medullary carcinoma, NOS                             | 1             |
| Other                                                                                                                                                                                                                                                                                                                                                                                                                                                                                                                                                                                         | 8574/3: Adenocarcinoma with neuroendocrine differentiation   | 12            |
| Other                                                                                                                                                                                                                                                                                                                                                                                                                                                                                                                                                                                         | 8575/3: Metaplastic carcinoma, NOS                           | 1             |
| Other                                                                                                                                                                                                                                                                                                                                                                                                                                                                                                                                                                                         | 8806/3: Desmoplastic small round cell tumor                  | 1             |
| Other                                                                                                                                                                                                                                                                                                                                                                                                                                                                                                                                                                                         | 8830/3: Malignant fibrous histiocytoma                       | 1             |
| Other                                                                                                                                                                                                                                                                                                                                                                                                                                                                                                                                                                                         | 8940/3: Mixed tumor, malignant, NOS                          | 2             |
| Other                                                                                                                                                                                                                                                                                                                                                                                                                                                                                                                                                                                         | 8963/3: Malignant rhabdoid tumor                             | 3             |
| Other                                                                                                                                                                                                                                                                                                                                                                                                                                                                                                                                                                                         | 9014/3: Serous adenocarcinofibroma                           | 2             |
| Other                                                                                                                                                                                                                                                                                                                                                                                                                                                                                                                                                                                         | 9110/3: Mesonephroma, malignant                              | 4             |
| Other                                                                                                                                                                                                                                                                                                                                                                                                                                                                                                                                                                                         | 9364/3: Peripheral neuroectodermal tumor                     | 2             |
| Other                                                                                                                                                                                                                                                                                                                                                                                                                                                                                                                                                                                         | 9473/3: Primitive neuroectodermal tumor                      | 4             |
| <b>Total Other</b>                                                                                                                                                                                                                                                                                                                                                                                                                                                                                                                                                                            |                                                              | <b>803</b>    |
| <b>Total</b>                                                                                                                                                                                                                                                                                                                                                                                                                                                                                                                                                                                  |                                                              | <b>16,797</b> |
| <p>*Includes microscopically confirmed cases of invasive corpus uteri and uterine corpus not otherwise specified (NOS) cancers using the first matching record from the SEER 18 Incidence-Based Mortality database</p> <p>^Histologic diagnoses were defined by the third edition of the International Classification of Diseases for Oncology histology codes</p> <p># Deaths caused by adenocarcinoma NOS (n=1,128), were reclassified according to the observed distribution of endometrioid and non-endometrioid deaths by year, age, race, and ethnicity as previously described.(3)</p> |                                                              |               |

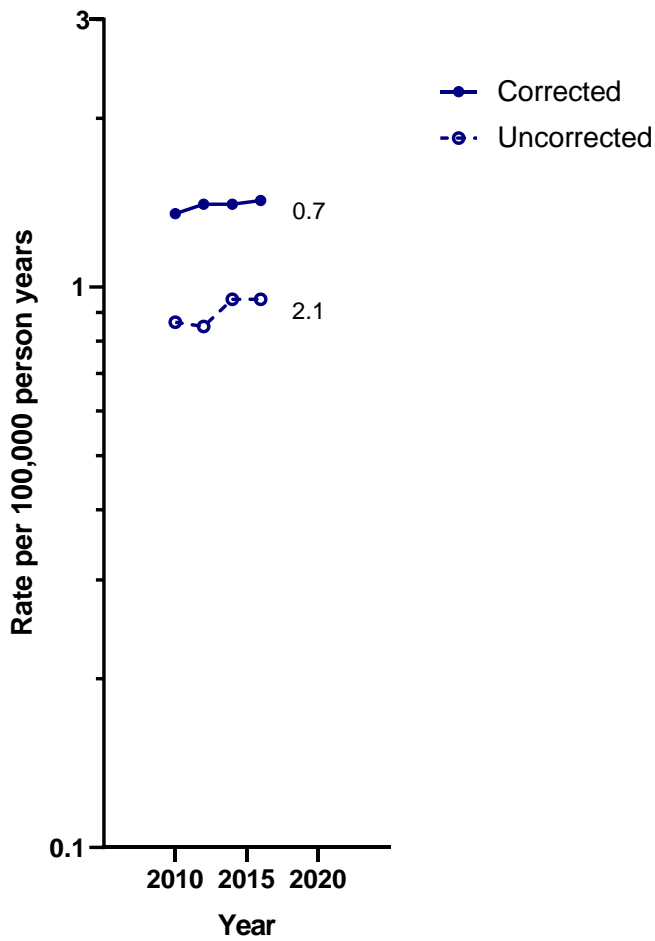

**eFigure 2. Uterine Sarcoma Incidence-Based Mortality, SEER18 (2010-2017), Uncorrected and Corrected for Hysterectomy.** Trends in age-adjusted incidence-based mortality rates of microscopically confirmed uterine sarcomas uncorrected (hollow circle) and corrected (solid circle) for hysterectomy prevalence, among US women aged 40 to 85+ years. Rates are based on two-year averages, all trends are summarized by a single annual percentage change estimate.



| eTable 2. Uterine Cancer Incidence-Based Mortality Rates by Year (2010 and 2017), Subtype, and Race and Ethnicity, Uncorrected and Corrected for Hysterectomy, SEER18 |                                             |      |                                |                                           |      |                                |
|-----------------------------------------------------------------------------------------------------------------------------------------------------------------------|---------------------------------------------|------|--------------------------------|-------------------------------------------|------|--------------------------------|
|                                                                                                                                                                       | Uncorrected Incidence-Based Mortality Rates |      |                                | Corrected Incidence-Based Mortality Rates |      |                                |
|                                                                                                                                                                       | 2010                                        | 2017 | Corresponding APC <sup>^</sup> | 2010                                      | 2017 | Corresponding APC <sup>^</sup> |
| <b>All Uterine Cancers</b>                                                                                                                                            | 8.6                                         | 9.8  | 2.2*                           | 14.9                                      | 16.7 | 1.8*                           |
| <b>Endometrioid Subtypes</b>                                                                                                                                          | 3.5                                         | 4.0  | 1.3*                           | 6.1                                       | 6.7  | 0.8                            |
| <b>Non-Endometrioid Subtypes</b>                                                                                                                                      | 3.8                                         | 4.5  | 3.0*                           | 6.6                                       | 7.8  | 2.7*                           |
|                                                                                                                                                                       |                                             |      |                                |                                           |      |                                |
| <b>All Uterine Cancers</b>                                                                                                                                            |                                             |      |                                |                                           |      |                                |
| Hispanic                                                                                                                                                              | 7.4                                         | 8.8  | 3.8*                           | 11.6                                      | 13.6 | 3.5*                           |
| Non-Hispanic Asian/Pac. Islander                                                                                                                                      | 6.5                                         | 7.9  | 3.1                            | 8.6                                       | 10.5 | 3.1                            |
| Non-Hispanic Black                                                                                                                                                    | 13.8                                        | 16.4 | 2.8*                           | 27.4                                      | 31.8 | 2.2                            |
| Non-Hispanic White                                                                                                                                                    | 8.3                                         | 9.1  | 1.7*                           | 14.8                                      | 15.9 | 1.4*                           |
|                                                                                                                                                                       |                                             |      |                                |                                           |      |                                |
| <b>Endometrioid Subtypes</b>                                                                                                                                          |                                             |      |                                |                                           |      |                                |
| Hispanic                                                                                                                                                              | 3.0                                         | 3.3  | 0.3                            | 4.7                                       | 5.0  | -0.2                           |
| Non-Hispanic Asian/Pac. Islander                                                                                                                                      | 2.0                                         | 3.1  | 4.6                            | 2.7                                       | 4.1  | 4.3                            |
| Non-Hispanic Black                                                                                                                                                    | 4.0                                         | 3.9  | 1.5                            | 8.1                                       | 7.6  | -1.8                           |
| Non-Hispanic White                                                                                                                                                    | 3.8                                         | 4.2  | 1.1                            | 6.7                                       | 7.3  | 1.1                            |
|                                                                                                                                                                       |                                             |      |                                |                                           |      |                                |
| <b>Non-Endometrioid Subtypes</b>                                                                                                                                      |                                             |      |                                |                                           |      |                                |
| Hispanic                                                                                                                                                              | 3.4                                         | 4.1  | 7.1*                           | 5.4                                       | 6.6  | 6.7*                           |
| Non-Hispanic Asian/Pac. Islander                                                                                                                                      | 2.7                                         | 3.6  | 3.5*                           | 3.7                                       | 4.9  | 3.4*                           |
| Non-Hispanic Black                                                                                                                                                    | 7.7                                         | 10.1 | 3.6*                           | 15.4                                      | 19.9 | 3.5*                           |
| Non-Hispanic White                                                                                                                                                    | 3.4                                         | 3.7  | 1.5*                           | 6.1                                       | 6.7  | 1.5*                           |
|                                                                                                                                                                       |                                             |      |                                |                                           |      |                                |
| <b>Sarcomas</b>                                                                                                                                                       | 0.9                                         | 0.9  |                                | 1.5                                       | 1.4  |                                |

<sup>^</sup>Refers to the corresponding APC for the entire time period; values for non-Hispanic Asian/Pacific Islanders for all uterine cancers and for non-Hispanic Blacks for all uterine cancers and nonendometrioid subtypes correspond to average APCs \*P<0.05

Abbreviations: Pac. Is, Pacific Islander; APC, Annual Percentage Change

Incidence-Based Mortality rates were age adjusted to the 2000 US standard population and expressed per 100,000 person-years.
